# Supplementary material
Source: publisher site journal article supplement (https://www.spandidos-publications.com/1640/downloadSupplementary)
Supplement: Supplementary file 1 [file downloadSupplementary]

## Sheet: Table S4. KEGG pathwy enrichmen
Table SIV. Kyoto Encyclopedia of Genes and Genomes pathway enrichment analysis of co-expressed mRNA.
	ID	Description	GeneRatio	BgRatio	pvalue	p.adjust	qvalue	geneID	Count
hsa04510	hsa04510	Focal adhesion	15/92	199/7470	1.53767e-08	2.58328e-06	2.16892e-06	LAMA4/FLT4/FLNA/COL1A2/COL6A2/MYL9/COL6A3/AKT3/PDGFRB/THBS1/ITGA5/VEGFC/COL4A2/LAMA2/ITGA11	15
hsa04512	hsa04512	ECM-receptor interaction	9/92	82/7470	6.14646e-07	5.16303e-05	4.33487e-05	LAMA4/COL1A2/COL6A2/COL6A3/THBS1/ITGA5/COL4A2/LAMA2/ITGA11	9
hsa04974	hsa04974	Protein digestion and absorption	9/92	90/7470	1.36662e-06	7.65308e-05	6.42551e-05	COL18A1/COL3A1/COL1A2/ELN/COL6A2/COL14A1/COL6A3/COL5A1/COL4A2	9
hsa05205	hsa05205	Proteoglycans in cancer	12/92	201/7470	5.69244e-06	0.000239083	0.000200733	TGFB1/FLNA/TIMP3/DCN/MMP2/SDC2/AKT3/MRAS/LUM/MSN/THBS1/ITGA5	12
hsa04151	hsa04151	PI3K-Akt signaling pathway	15/92	354/7470	2.36816e-05	0.000795701	0.00066807	LAMA4/FLT4/F2R/COL1A2/GNB4/COL6A2/COL6A3/AKT3/PDGFRB/THBS1/ITGA5/VEGFC/COL4A2/LAMA2/ITGA11	15
hsa04926	hsa04926	Relaxin signaling pathway	9/92	130/7470	2.84758e-05	0.000797322	0.000669431	TGFB1/COL3A1/COL1A2/GNB4/MMP2/ACTA2/AKT3/VEGFC/COL4A2	9
hsa04933	hsa04933	AGE-RAGE signaling pathway in diabetic complications	7/92	99/7470	0.000202542	0.004861	0.00408129	TGFB1/COL3A1/COL1A2/MMP2/AKT3/VEGFC/COL4A2	7
hsa05165	hsa05165	Human papillomavirus infection	13/92	339/7470	0.000238225	0.00500273	0.00420029	LAMA4/COL1A2/COL6A2/COL6A3/AKT3/NOTCH3/PDGFRB/THBS1/HEYL/ITGA5/COL4A2/LAMA2/ITGA11	13
hsa04270	hsa04270	Vascular smooth muscle contraction	7/92	121/7470	0.000690099	0.0127848	0.0107341	PRKG1/EDNRA/PTGIR/MYL9/MRVI1/ACTA2/CALD1	7
hsa04611	hsa04611	Platelet activation	7/92	123/7470	0.000760998	0.0127848	0.0107341	COL3A1/F2R/COL1A2/PRKG1/PTGIR/TBXA2R/AKT3	7
hsa04015	hsa04015	Rap1 signaling pathway	9/92	206/7470	0.000928071	0.0141742	0.0119006	PRKD1/FLT4/F2R/SIPA1/AKT3/MRAS/PDGFRB/THBS1/VEGFC	9
hsa05146	hsa05146	Amoebiasis	6/92	96/7470	0.00112827	0.0157958	0.0132621	LAMA4/TGFB1/COL3A1/COL1A2/COL4A2/LAMA2	6
hsa04371	hsa04371	Apelin signaling pathway	7/92	137/7470	0.00143389	0.0185303	0.015558	GNB4/ACTA2/AKT3/NOTCH3/MRAS/MEF2C/CTGF	7
hsa04670	hsa04670	Leukocyte transendothelial migration	6/92	112/7470	0.00248866	0.0298639	0.0250737	JAM3/SIPA1/MMP2/MYL9/THY1/MSN	6
hsa04610	hsa04610	Complement and coagulation cascades	5/92	79/7470	0.00279438	0.031297	0.026277	F2R/C1R/SERPING1/A2M/C1S	5
hsa05144	hsa05144	Malaria	4/92	49/7470	0.00299008	0.0313958	0.0263599	TGFB1/GYPC/SDC2/THBS1	4
hsa04145	hsa04145	Phagosome	6/92	152/7470	0.0109085	0.0983579	0.0825812	TUBB6/C1R/MRC2/TUBA1A/THBS1/ITGA5	6
hsa05206	hsa05206	MicroRNAs in cancer	9/92	299/7470	0.0110287	0.0983579	0.0825812	ZFPM2/TIMP3/RECK/VIM/NOTCH3/PDGFRB/ZEB1/THBS1/ITGA5	9
hsa04024	hsa04024	cAMP signaling pathway	7/92	199/7470	0.0111238	0.0983579	0.0825812	F2R/PTGER3/GLI1/GLI3/EDNRA/MYL9/AKT3	7
hsa05133	hsa05133	Pertussis	4/92	76/7470	0.0140854	0.118317	0.0993389	C1R/SERPING1/ITGA5/C1S	4
hsa04022	hsa04022	cGMP-PKG signaling pathway	6/92	163/7470	0.0150081	0.119949	0.100709	PRKG1/EDNRA/MYL9/MRVI1/AKT3/MEF2C	6
hsa04810	hsa04810	Regulation of actin cytoskeleton	7/92	213/7470	0.0157076	0.119949	0.100709	F2R/MYL9/MRAS/PDGFRB/MSN/ITGA5/ITGA11	7
hsa05410	hsa05410	Hypertrophic cardiomyopathy (HCM)	4/92	83/7470	0.0189107	0.137463	0.115414	TGFB1/ITGA5/LAMA2/ITGA11	4
hsa04340	hsa04340	Hedgehog signaling pathway	3/92	47/7470	0.0198391	0.137463	0.115414	GLI1/GLI3/EVC	3
hsa04350	hsa04350	TGF-beta signaling pathway	4/92	85/7470	0.0204558	0.137463	0.115414	TGFB1/DCN/THBS1/LTBP1	4
hsa04540	hsa04540	Gap junction	4/92	88/7470	0.0229158	0.140062	0.117596	TUBB6/PRKG1/TUBA1A/PDGFRB	4
hsa04014	hsa04014	Ras signaling pathway	7/92	232/7470	0.0238962	0.140062	0.117596	FLT4/ETS1/GNB4/AKT3/MRAS/PDGFRB/VEGFC	7
hsa05414	hsa05414	Dilated cardiomyopathy (DCM)	4/92	90/7470	0.024652	0.140062	0.117596	TGFB1/ITGA5/LAMA2/ITGA11	4
hsa00532	hsa00532	Glycosaminoglycan biosynthesis - chondroitin sulfate / dermatan sulfate	2/92	20/7470	0.0246852	0.140062	0.117596	CSGALNACT2/CHST7	2
hsa04020	hsa04020	Calcium signaling pathway	6/92	183/7470	0.0250111	0.140062	0.117596	PDE1A/F2R/PTGER3/EDNRA/TBXA2R/PDGFRB	6
hsa05222	hsa05222	Small cell lung cancer	4/92	93/7470	0.0274022	0.145314	0.122005	LAMA4/AKT3/COL4A2/LAMA2	4
hsa04010	hsa04010	MAPK signaling pathway	8/92	295/7470	0.0284309	0.145314	0.122005	FLT4/TGFB1/FLNA/AKT3/MRAS/PDGFRB/MEF2C/VEGFC	8
hsa04923	hsa04923	Regulation of lipolysis in adipocytes	3/92	54/7470	0.0285438	0.145314	0.122005	PTGER3/PRKG1/AKT3	3
hsa05215	hsa05215	Prostate cancer	4/92	97/7470	0.0313447	0.15488	0.130037	ERG/AKT3/PDGFRB/ZEB1	4
hsa05145	hsa05145	Toxoplasmosis	4/92	113/7470	0.0503152	0.241513	0.202774	LAMA4/TGFB1/AKT3/LAMA2	4
hsa05211	hsa05211	Renal cell carcinoma	3/92	69/7470	0.0529186	0.246953	0.207342	TGFB1/ETS1/AKT3	3
hsa04530	hsa04530	Tight junction	5/92	170/7470	0.0581792	0.259489	0.217867	AMOTL1/JAM3/MYL9/TUBA1A/MSN	5
hsa05412	hsa05412	Arrhythmogenic right ventricular cardiomyopathy (ARVC)	3/92	72/7470	0.058694	0.259489	0.217867	ITGA5/LAMA2/ITGA11	3
hsa01521	hsa01521	EGFR tyrosine kinase inhibitor resistance	3/92	79/7470	0.0732659	0.315607	0.264983	AXL/AKT3/PDGFRB	3
hsa05202	hsa05202	Transcriptional misregulation in cancer	5/92	186/7470	0.0789298	0.331505	0.278331	ERG/CDK14/ZEB1/MAF/MEF2C	5
hsa05219	hsa05219	Bladder cancer	2/92	41/7470	0.0903387	0.367704	0.308724	MMP2/THBS1	2
hsa05418	hsa05418	Fluid shear stress and atherosclerosis	4/92	139/7470	0.0919261	0.367704	0.308724	MMP2/SDC2/AKT3/MEF2C	4
hsa04514	hsa04514	Cell adhesion molecules (CAMs)	4/92	144/7470	0.101376	0.396074	0.332543	PTPRM/VCAN/JAM3/SDC2	4
hsa04072	hsa04072	Phospholipase D signaling pathway	4/92	146/7470	0.105278	0.400419	0.336192	F2R/AKT3/MRAS/PDGFRB	4
hsa05224	hsa05224	Breast cancer	4/92	147/7470	0.107255	0.400419	0.336192	FLT4/AKT3/NOTCH3/HEYL	4
hsa01522	hsa01522	Endocrine resistance	3/92	98/7470	0.119784	0.437471	0.3673	MMP2/AKT3/NOTCH3	3
hsa04080	hsa04080	Neuroactive ligand-receptor interaction	6/92	277/7470	0.125789	0.446298	0.374711	NR3C1/F2R/PTGER3/EDNRA/PTGIR/TBXA2R	6
hsa00430	hsa00430	Taurine and hypotaurine metabolism	1/92	11/7470	0.127514	0.446298	0.374711	GGT5	1
hsa04218	hsa04218	Cellular senescence	4/92	160/7470	0.134442	0.460942	0.387007	TGFB1/ETS1/AKT3/MRAS	4
hsa05130	hsa05130	Pathogenic Escherichia coli infection	2/92	55/7470	0.146854	0.493429	0.414282	TUBB6/TUBA1A	2
hsa05150	hsa05150	Staphylococcus aureus infection	2/92	56/7470	0.151132	0.497846	0.417991	C1R/C1S	2
hsa04919	hsa04919	Thyroid hormone signaling pathway	3/92	116/7470	0.171464	0.552115	0.463555	RCAN2/AKT3/NOTCH3	3
hsa05217	hsa05217	Basal cell carcinoma	2/92	63/7470	0.181708	0.552115	0.463555	GLI1/GLI3	2
hsa00360	hsa00360	Phenylalanine metabolism	1/92	17/7470	0.190143	0.552115	0.463555	AOC3	1
hsa00450	hsa00450	Selenocompound metabolism	1/92	17/7470	0.190143	0.552115	0.463555	INMT	1
hsa04924	hsa04924	Renin secretion	2/92	65/7470	0.190611	0.552115	0.463555	PDE1A/EDNRA	2
hsa05230	hsa05230	Central carbon metabolism in cancer	2/92	65/7470	0.190611	0.552115	0.463555	AKT3/PDGFRB	2
hsa05321	hsa05321	Inflammatory bowel disease (IBD)	2/92	65/7470	0.190611	0.552115	0.463555	TGFB1/MAF	2
hsa04380	hsa04380	Osteoclast differentiation	3/92	128/7470	0.208908	0.594855	0.49944	TGFB1/AKT3/CTSK	3
hsa05214	hsa05214	Glioma	2/92	71/7470	0.217641	0.609395	0.511647	AKT3/PDGFRB	2
hsa05218	hsa05218	Melanoma	2/92	72/7470	0.222182	0.611912	0.513761	AKT3/PDGFRB	2
hsa04210	hsa04210	Apoptosis	3/92	136/7470	0.234818	0.628935	0.528053	AKT3/TUBA1A/CTSK	3
hsa05212	hsa05212	Pancreatic cancer	2/92	75/7470	0.235851	0.628935	0.528053	TGFB1/AKT3	2
hsa05220	hsa05220	Chronic myeloid leukemia	2/92	76/7470	0.240419	0.631099	0.52987	TGFB1/AKT3	2
hsa05210	hsa05210	Colorectal cancer	2/92	86/7470	0.286224	0.739778	0.621117	TGFB1/AKT3	2
hsa04390	hsa04390	Hippo signaling pathway	3/92	154/7470	0.29486	0.750553	0.630164	TGFB1/WWTR1/CTGF	3
hsa04392	hsa04392	Hippo signaling pathway - multiple species	1/92	29/7470	0.302365	0.752322	0.631648	WWTR1	1
hsa05323	hsa05323	Rheumatoid arthritis	2/92	90/7470	0.304511	0.752322	0.631648	TGFB1/CTSK	2
hsa05032	hsa05032	Morphine addiction	2/92	91/7470	0.309072	0.752523	0.631818	PDE1A/GNB4	2
hsa04658	hsa04658	Th1 and Th2 cell differentiation	2/92	92/7470	0.313627	0.752705	0.631971	NOTCH3/MAF	2
hsa00410	hsa00410	beta-Alanine metabolism	1/92	31/7470	0.31951	0.756025	0.634758	AOC3	1
hsa04713	hsa04713	Circadian entrainment	2/92	96/7470	0.331782	0.774158	0.649982	PRKG1/GNB4	2
hsa05231	hsa05231	Choline metabolism in cancer	2/92	99/7470	0.345314	0.781879	0.656465	AKT3/PDGFRB	2
hsa05143	hsa05143	African trypanosomiasis	1/92	35/7470	0.352561	0.781879	0.656465	LAMA4	1
hsa04144	hsa04144	Endocytosis	4/92	244/7470	0.353865	0.781879	0.656465	WIPF1/RAB31/EHD3/EHD2	4
hsa05142	hsa05142	Chagas disease (American trypanosomiasis)	2/92	102/7470	0.358759	0.781879	0.656465	TGFB1/AKT3	2
hsa00350	hsa00350	Tyrosine metabolism	1/92	36/7470	0.360572	0.781879	0.656465	AOC3	1
hsa04620	hsa04620	Toll-like receptor signaling pathway	2/92	104/7470	0.367669	0.781879	0.656465	AKT3/CTSK	2
hsa04625	hsa04625	C-type lectin receptor signaling pathway	2/92	104/7470	0.367669	0.781879	0.656465	AKT3/MRAS	2
hsa05152	hsa05152	Tuberculosis	3/92	179/7470	0.379465	0.796877	0.669057	TGFB1/MRC2/AKT3	3
hsa00260	hsa00260	Glycine, serine and threonine metabolism	1/92	40/7470	0.391649	0.79771	0.669757	AOC3	1
hsa00380	hsa00380	Tryptophan metabolism	1/92	40/7470	0.391649	0.79771	0.669757	INMT	1
hsa04668	hsa04668	TNF signaling pathway	2/92	110/7470	0.394107	0.79771	0.669757	AKT3/VEGFC	2
hsa04725	hsa04725	Cholinergic synapse	2/92	112/7470	0.402812	0.805625	0.676402	GNB4/AKT3	2
hsa04940	hsa04940	Type I diabetes mellitus	1/92	43/7470	0.413971	0.809234	0.679432	CPE	1
hsa04973	hsa04973	Carbohydrate digestion and absorption	1/92	44/7470	0.42123	0.809234	0.679432	AKT3	1
hsa04330	hsa04330	Notch signaling pathway	1/92	48/7470	0.449389	0.809234	0.679432	NOTCH3	1
hsa05169	hsa05169	Epstein-Barr virus infection	3/92	201/7470	0.452282	0.809234	0.679432	ENTPD1/AKT3/VIM	3
hsa04672	hsa04672	Intestinal immune network for IgA production	1/92	49/7470	0.456214	0.809234	0.679432	TGFB1	1
hsa04978	hsa04978	Mineral absorption	1/92	51/7470	0.469614	0.809234	0.679432	CYBRD1	1
hsa04140	hsa04140	Autophagy - animal	2/92	128/7470	0.470188	0.809234	0.679432	AKT3/MRAS	2
hsa04728	hsa04728	Dopaminergic synapse	2/92	131/7470	0.482325	0.809234	0.679432	GNB4/AKT3	2
hsa04068	hsa04068	FoxO signaling pathway	2/92	132/7470	0.486333	0.809234	0.679432	TGFB1/AKT3	2
hsa05162	hsa05162	Measles	2/92	132/7470	0.486333	0.809234	0.679432	AKT3/MSN	2
hsa05322	hsa05322	Systemic lupus erythematosus	2/92	133/7470	0.490323	0.809234	0.679432	C1R/C1S	2
hsa00480	hsa00480	Glutathione metabolism	1/92	56/7470	0.501702	0.809234	0.679432	GGT5	1
hsa04915	hsa04915	Estrogen signaling pathway	2/92	137/7470	0.506088	0.809234	0.679432	MMP2/AKT3	2
hsa05166	hsa05166	Human T-cell leukemia virus 1 infection	3/92	219/7470	0.509261	0.809234	0.679432	TGFB1/ETS1/AKT3	3
hsa05213	hsa05213	Endometrial cancer	1/92	58/7470	0.513993	0.809234	0.679432	AKT3	1
hsa04370	hsa04370	VEGF signaling pathway	1/92	59/7470	0.520026	0.809234	0.679432	AKT3	1
hsa05416	hsa05416	Viral myocarditis	1/92	59/7470	0.520026	0.809234	0.679432	LAMA2	1
hsa04730	hsa04730	Long-term depression	1/92	60/7470	0.525984	0.809234	0.679432	PRKG1	1
hsa05163	hsa05163	Human cytomegalovirus infection	3/92	225/7470	0.527582	0.809234	0.679432	PTGER3/GNB4/AKT3	3
hsa05161	hsa05161	Hepatitis B	2/92	144/7470	0.532919	0.809234	0.679432	TGFB1/AKT3	2
hsa04213	hsa04213	Longevity regulating pathway - multiple species	1/92	62/7470	0.537682	0.809234	0.679432	AKT3	1
hsa00590	hsa00590	Arachidonic acid metabolism	1/92	63/7470	0.543424	0.809234	0.679432	GGT5	1
hsa04310	hsa04310	Wnt signaling pathway	2/92	149/7470	0.551477	0.809234	0.679432	SERPINF1/SFRP4	2
hsa04932	hsa04932	Non-alcoholic fatty liver disease (NAFLD)	2/92	149/7470	0.551477	0.809234	0.679432	TGFB1/AKT3	2
hsa05226	hsa05226	Gastric cancer	2/92	149/7470	0.551477	0.809234	0.679432	TGFB1/AKT3	2
hsa04137	hsa04137	Mitophagy - animal	1/92	65/7470	0.554696	0.809234	0.679432	MRAS	1
hsa05131	hsa05131	Shigellosis	1/92	65/7470	0.554696	0.809234	0.679432	ITGA5	1
hsa05221	hsa05221	Acute myeloid leukemia	1/92	66/7470	0.560229	0.809234	0.679432	AKT3	1
hsa05223	hsa05223	Non-small cell lung cancer	1/92	66/7470	0.560229	0.809234	0.679432	AKT3	1
hsa04921	hsa04921	Oxytocin signaling pathway	2/92	152/7470	0.562365	0.809234	0.679432	MYL9/MEF2C	2
hsa04664	hsa04664	Fc epsilon RI signaling pathway	1/92	68/7470	0.57109	0.809234	0.679432	AKT3	1
hsa05120	hsa05120	Epithelial cell signaling in Helicobacter pylori infection	1/92	68/7470	0.57109	0.809234	0.679432	JAM3	1
hsa04920	hsa04920	Adipocytokine signaling pathway	1/92	69/7470	0.576421	0.809234	0.679432	AKT3	1
hsa04917	hsa04917	Prolactin signaling pathway	1/92	70/7470	0.581687	0.809234	0.679432	AKT3	1
hsa04662	hsa04662	B cell receptor signaling pathway	1/92	71/7470	0.586887	0.809234	0.679432	AKT3	1
hsa04115	hsa04115	p53 signaling pathway	1/92	72/7470	0.592024	0.809234	0.679432	THBS1	1
hsa04520	hsa04520	Adherens junction	1/92	72/7470	0.592024	0.809234	0.679432	PTPRM	1
hsa01524	hsa01524	Platinum drug resistance	1/92	73/7470	0.597098	0.809234	0.679432	AKT3	1
hsa04630	hsa04630	JAK-STAT signaling pathway	2/92	162/7470	0.597303	0.809234	0.679432	AKT3/PDGFRB	2
hsa05100	hsa05100	Bacterial invasion of epithelial cells	1/92	74/7470	0.602109	0.809234	0.679432	ITGA5	1
hsa05140	hsa05140	Leishmaniasis	1/92	74/7470	0.602109	0.809234	0.679432	TGFB1	1
hsa05225	hsa05225	Hepatocellular carcinoma	2/92	168/7470	0.617259	0.823011	0.691	TGFB1/AKT3	2
hsa00230	hsa00230	Purine metabolism	2/92	174/7470	0.636459	0.841203	0.706273	PDE1A/ENTPD1	2
hsa04742	hsa04742	Taste transduction	1/92	83/7470	0.644522	0.841203	0.706273	PDE1A	1
hsa04012	hsa04012	ErbB signaling pathway	1/92	85/7470	0.653322	0.841203	0.706273	AKT3	1
hsa05132	hsa05132	Salmonella infection	1/92	86/7470	0.657641	0.841203	0.706273	FLNA	1
hsa04727	hsa04727	GABAergic synapse	1/92	88/7470	0.666119	0.841203	0.706273	GNB4	1
hsa04211	hsa04211	Longevity regulating pathway	1/92	89/7470	0.67028	0.841203	0.706273	AKT3	1
hsa05167	hsa05167	Kaposi sarcoma-associated herpesvirus infection	2/92	186/7470	0.672616	0.841203	0.706273	GNB4/AKT3	2
hsa04970	hsa04970	Salivary secretion	1/92	90/7470	0.67439	0.841203	0.706273	PRKG1	1
hsa04666	hsa04666	Fc gamma R-mediated phagocytosis	1/92	91/7470	0.678449	0.841203	0.706273	AKT3	1
hsa04062	hsa04062	Chemokine signaling pathway	2/92	189/7470	0.681194	0.841203	0.706273	GNB4/AKT3	2
hsa04912	hsa04912	GnRH signaling pathway	1/92	93/7470	0.686418	0.841203	0.706273	MMP2	1
hsa04925	hsa04925	Aldosterone synthesis and secretion	1/92	96/7470	0.698006	0.841203	0.706273	PRKD1	1
hsa04640	hsa04640	Hematopoietic cell lineage	1/92	97/7470	0.701774	0.841203	0.706273	ITGA5	1
hsa04914	hsa04914	Progesterone-mediated oocyte maturation	1/92	99/7470	0.70917	0.841203	0.706273	AKT3	1
hsa04066	hsa04066	HIF-1 signaling pathway	1/92	100/7470	0.7128	0.841203	0.706273	AKT3	1
hsa00240	hsa00240	Pyrimidine metabolism	1/92	101/7470	0.716385	0.841203	0.706273	ENTPD1	1
hsa04660	hsa04660	T cell receptor signaling pathway	1/92	101/7470	0.716385	0.841203	0.706273	AKT3	1
hsa04922	hsa04922	Glucagon signaling pathway	1/92	103/7470	0.723423	0.841203	0.706273	AKT3	1
hsa04928	hsa04928	Parathyroid hormone synthesis, secretion and action	1/92	106/7470	0.733658	0.841203	0.706273	MEF2C	1
hsa04659	hsa04659	Th17 cell differentiation	1/92	107/7470	0.736985	0.841203	0.706273	TGFB1	1
hsa04931	hsa04931	Insulin resistance	1/92	107/7470	0.736985	0.841203	0.706273	AKT3	1
hsa05170	hsa05170	Human immunodeficiency virus 1 infection	2/92	212/7470	0.74106	0.841203	0.706273	GNB4/AKT3	2
hsa04724	hsa04724	Glutamatergic synapse	1/92	114/7470	0.759154	0.852822	0.716028	GNB4	1
hsa04726	hsa04726	Serotonergic synapse	1/92	115/7470	0.762166	0.852822	0.716028	GNB4	1
hsa04071	hsa04071	Sphingolipid signaling pathway	1/92	118/7470	0.770981	0.852822	0.716028	AKT3	1
hsa04722	hsa04722	Neurotrophin signaling pathway	1/92	119/7470	0.773847	0.852822	0.716028	AKT3	1
hsa04152	hsa04152	AMPK signaling pathway	1/92	120/7470	0.776677	0.852822	0.716028	AKT3	1
hsa04142	hsa04142	Lysosome	1/92	123/7470	0.78496	0.853714	0.716777	CTSK	1
hsa04110	hsa04110	Cell cycle	1/92	124/7470	0.787652	0.853714	0.716777	TGFB1	1
hsa05160	hsa05160	Hepatitis C	1/92	131/7470	0.80559	0.867559	0.728401	AKT3	1
hsa04910	hsa04910	Insulin signaling pathway	1/92	137/7470	0.819767	0.876429	0.735849	AKT3	1
hsa04550	hsa04550	Signaling pathways regulating pluripotency of stem cells	1/92	139/7470	0.824261	0.876429	0.735849	AKT3	1
hsa04261	hsa04261	Adrenergic signaling in cardiomyocytes	1/92	144/7470	0.835018	0.882283	0.740764	AKT3	1
hsa04723	hsa04723	Retrograde endocannabinoid signaling	1/92	148/7470	0.843152	0.88531	0.743305	GNB4	1
hsa04150	hsa04150	mTOR signaling pathway	1/92	151/7470	0.848991	0.885904	0.743804	AKT3	1
hsa04621	hsa04621	NOD-like receptor signaling pathway	1/92	168/7470	0.878239	0.898977	0.75478	ANTXR1	1
hsa05010	hsa05010	Alzheimer disease	1/92	171/7470	0.882785	0.898977	0.75478	APBB1	1
hsa05164	hsa05164	Influenza A	1/92	171/7470	0.882785	0.898977	0.75478	AKT3	1
hsa04060	hsa04060	Cytokine-cytokine receptor interaction	2/92	294/7470	0.882924	0.898977	0.75478	TGFB1/TNFSF12	2
hsa05034	hsa05034	Alcoholism	1/92	180/7470	0.895437	0.906225	0.760866	GNB4	1
hsa04714	hsa04714	Thermogenesis	1/92	229/7470	0.943997	0.94965	0.797325	PRKG1	1
hsa04740	hsa04740	Olfactory transduction	2/92	448/7470	0.977353	0.977353	0.820584	PDE1A/PRKG1	2
